# Supplementary material
Source: Springer Nature journal article supplement (https://www.springermedizin.de/resource/supplementary/12911_2012_558_MOESM3_ESM.pdf/9525826)

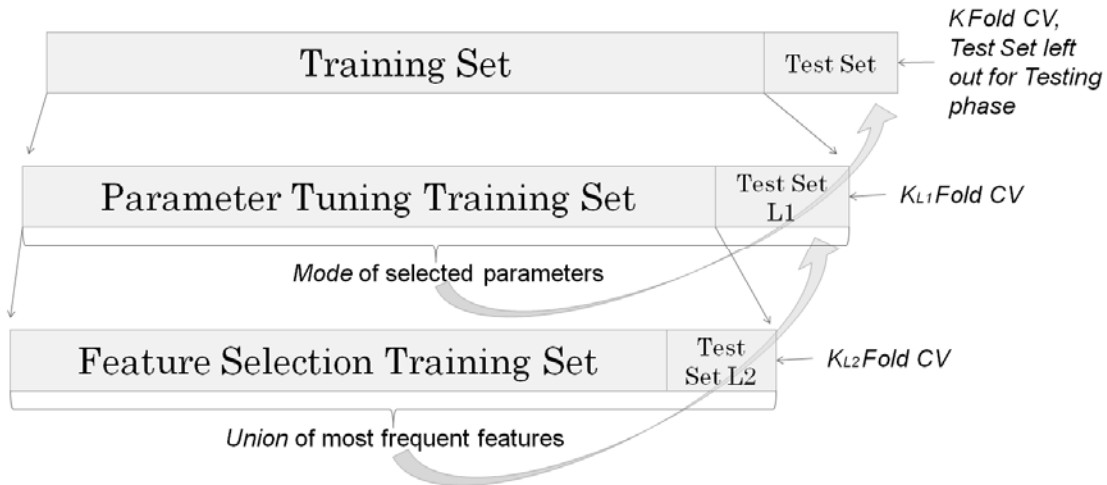

Supplement: MOESM3 [file 9525826]
